# Supplementary material for: A ratiometric fluorescence assay for acetylcholinesterase activity and inhibitor screening based on supramolecular assembly induced monomer–excimer emission transition of a perylene probe
Source: Royal Society of Chemistry journal article supplement (doi:10.1039/c8ra01274a), 2018-01-01
Supplement: c8ra01274a1.pdf [file c8ra01274a1.pdf]

# **A Ratiometric Fluorescence Assay for Acetylcholinesterase Activity and Inhibitor Screening Based on Supramolecular Assembly Induced Monomer-Excimer Emission Transition of a Perylene Probe**

Chunhua He<sup>ab</sup>, Huipeng Zhou<sup>b\*</sup>, Ejaz Hussain<sup>bc</sup>, Yunyi Zhang<sup>bd</sup>, Niu Niu<sup>bc</sup>, Yunhui Li<sup>a</sup>, Yuqin Ma<sup>a\*</sup>, Cong Yu<sup>bc\*</sup>

<sup>a</sup> Changchun University of Science and Technology, No. 7989, Weixing Road, Changchun 130022, P. R. China

<sup>b</sup> State Key Laboratory of Electroanalytical Chemistry, Changchun Institute of Applied Chemistry, Chinese Academy of Sciences, Changchun, 130022, P. R. China

<sup>c</sup> University of Chinese Academy of Sciences, Beijing, 100049, P. R. China

<sup>d</sup> School of Materials Science and Engineering, Tianjin University, Tianjin, 300072, P. R. China

\*Corresponding authors

E-mail: myq9393@sina.com; congyu@ciac.ac.cn; hpzhou@ciac.ac.cn;

## The inhibition efficiency

The inhibition efficiency ( $I_E$ ) is given by:  $I_E = [I - I_i]/[I - I_0]$

“ $I$ ” is the value of  $I_M/I_E$  at 548 nm and 680 nm in the absence of inhibitor, and “ $I_i$ ” is that in the presence of inhibitor. “ $I_0$ ” is the ratio of  $I_M/I_E$  at 548 nm and 680 nm in the absence of AChE.

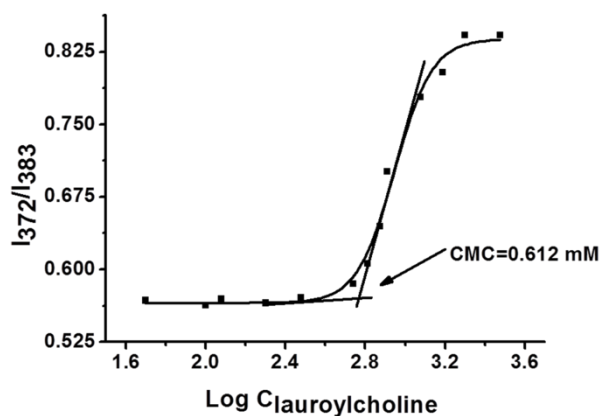

**Fig. S1** Plot of the intensity ratio  $I_{383} / I_{372}$  of pyrene (from emission spectra) as a function of the logarithm concentration of lauroylcholine.

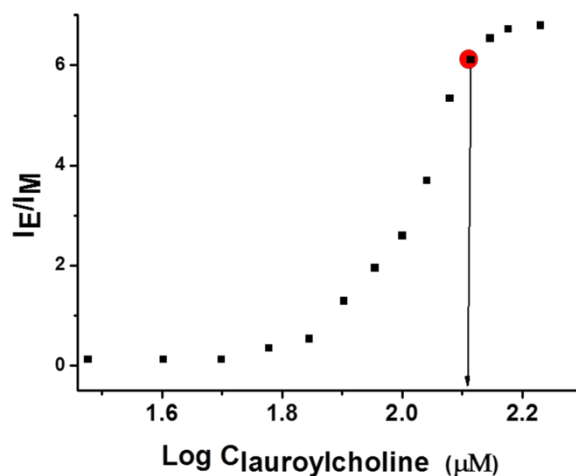

**Fig. S2** The plot of  $I_E/I_M$  value of PDI-DHA (10  $\mu\text{M}$ ) in lauroylcholine-lauric acid assemblies with the fixed ratio of [lauroylcholine] : [lauric acid] = 130  $\mu\text{M}$  : 300  $\mu\text{M}$ .

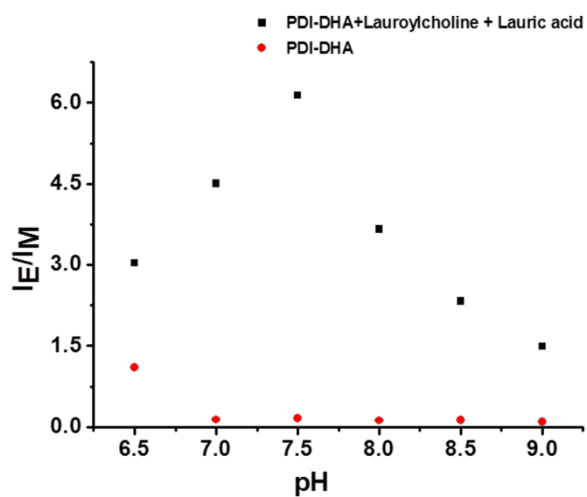

**Fig. S3** Plot of the  $I_E/I_M$  value of PDI-DHA in the presence (black plot) and absence (red plot) of the mixture of lauroylcholine (130  $\mu\text{M}$ ) and lauric acid (300  $\mu\text{M}$ ) under different pH values.

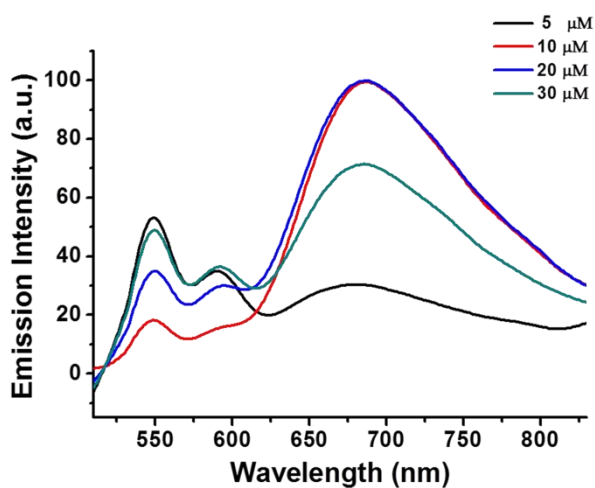

**Fig. S4** Changes in emission spectrum of the sample solutions containing lauric acid (300  $\mu\text{M}$ ), lauroylcholine (130  $\mu\text{M}$ ), and PDI-DHA of different concentrations (5, 10, 20, 30  $\mu\text{M}$ ).

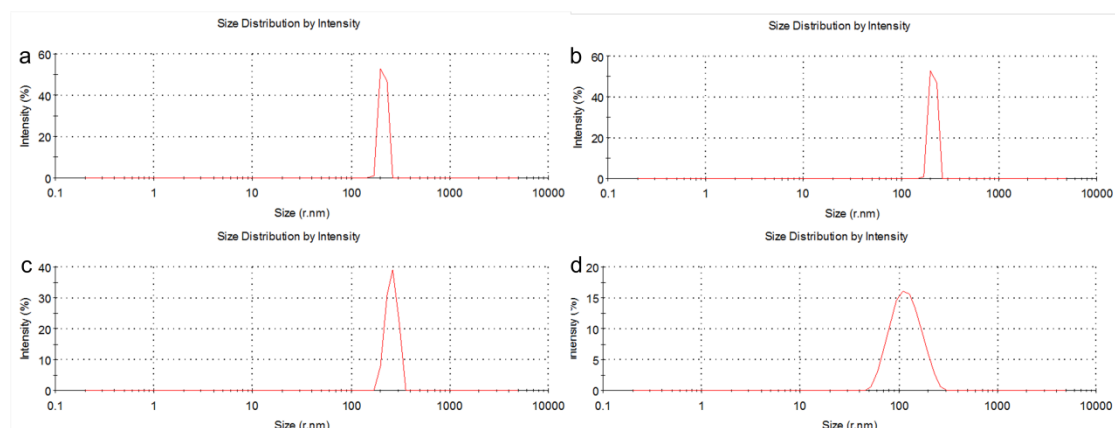

**Fig. S5** Dynamic light scattering results of the supramolecular assemblies, the sample mixture contained: (a) PDI-DHA (10  $\mu\text{M}$ ) and lauric acid (300  $\mu\text{M}$ ), (b) PDI-DHA (10  $\mu\text{M}$ ) and lauroylcholine (130  $\mu\text{M}$ ), (c) lauroylcholine (130  $\mu\text{M}$ ) and lauric acid (300  $\mu\text{M}$ ), (d) PDI-DHA (10  $\mu\text{M}$ ), lauroylcholine (130  $\mu\text{M}$ ) and lauric acid (300  $\mu\text{M}$ ).

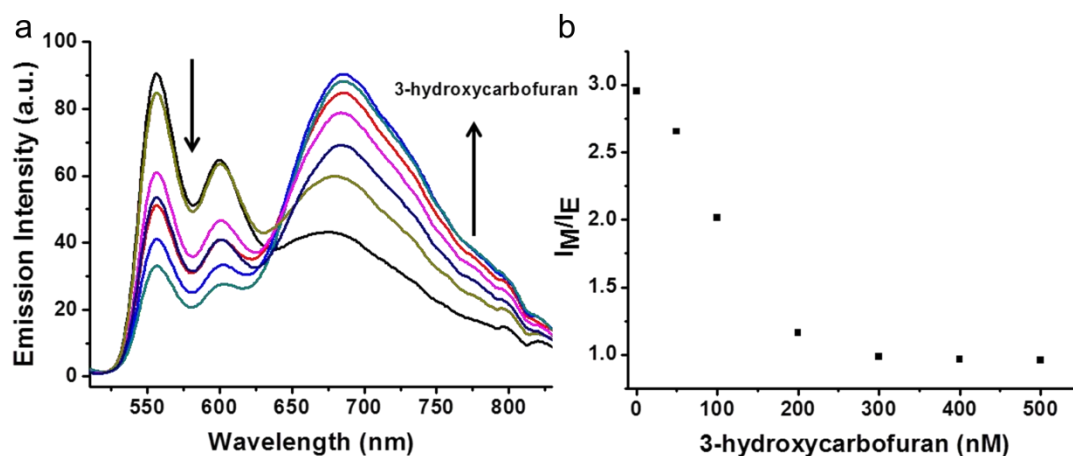

**Fig. S6** (a) Changes in emission spectrum of PDI-DHA (10  $\mu\text{M}$ ) upon the addition of increasing concentrations of 3-hydroxycarbofuran (0 - 500 nM). Assay solutions contained 130  $\mu\text{M}$  lauroylcholine and 300  $\mu\text{M}$  lauric acid, and 150 U/mL AChE. (b) Changes in  $I_M / I_E$  value with 3-hydroxycarbofuran concentration.

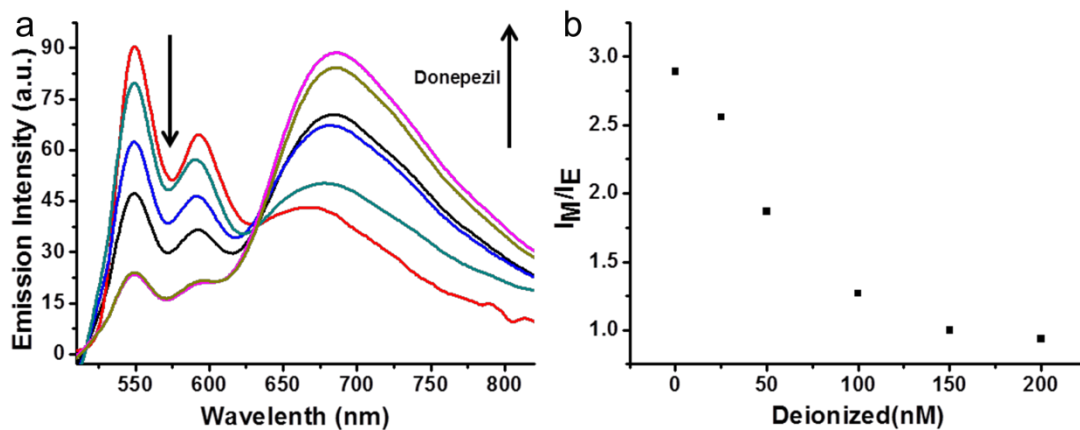

**Fig. S7** (a) Changes in emission spectrum of PDI-DHA (10  $\mu$ M) upon the addition of increasing concentrations of donepezil (0 - 200 nM). Assay solutions contained 130  $\mu$ M lauroylcholine and 300  $\mu$ M lauric acid, and 150 U/mL AChE. (b) Changes in  $I_M/I_E$  value with donepezil concentration.
